# Supplementary material
Source: MDPI journal article supplement (https://www.mdpi.com/2076-3417/12/24/13022)

## Supplementary Data

This section presents the results of the flexural properties assessment done within the scope of the article entitled *Additive manufacturing of glass-ceramic parts from recycled glass using a novel selective powder deposition process*.

Stress-Strain curves of each specimen are computed using the transverse section dimension values that were experimentally measured.

For each batch of four specimens, a graphic representation of the results is used where the numbering of each specimen can be distinguished in the graphics using the color scheme of Figure A.

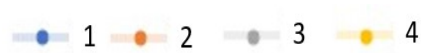

**Figure S0.** Correlation of each specimen number to the experimental Stress-Strain curve within each batch.

Figure S1: Stress-Strain Curves of the Batch 1h

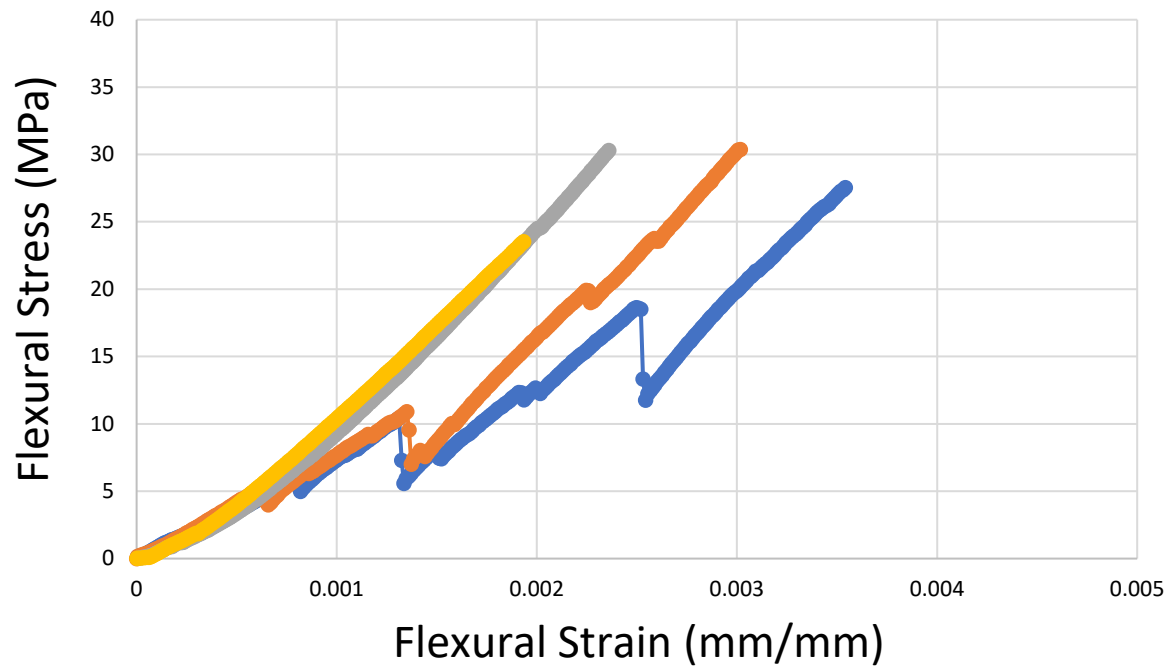

Figure S2: Stress-Strain Curves of the Batch 1v

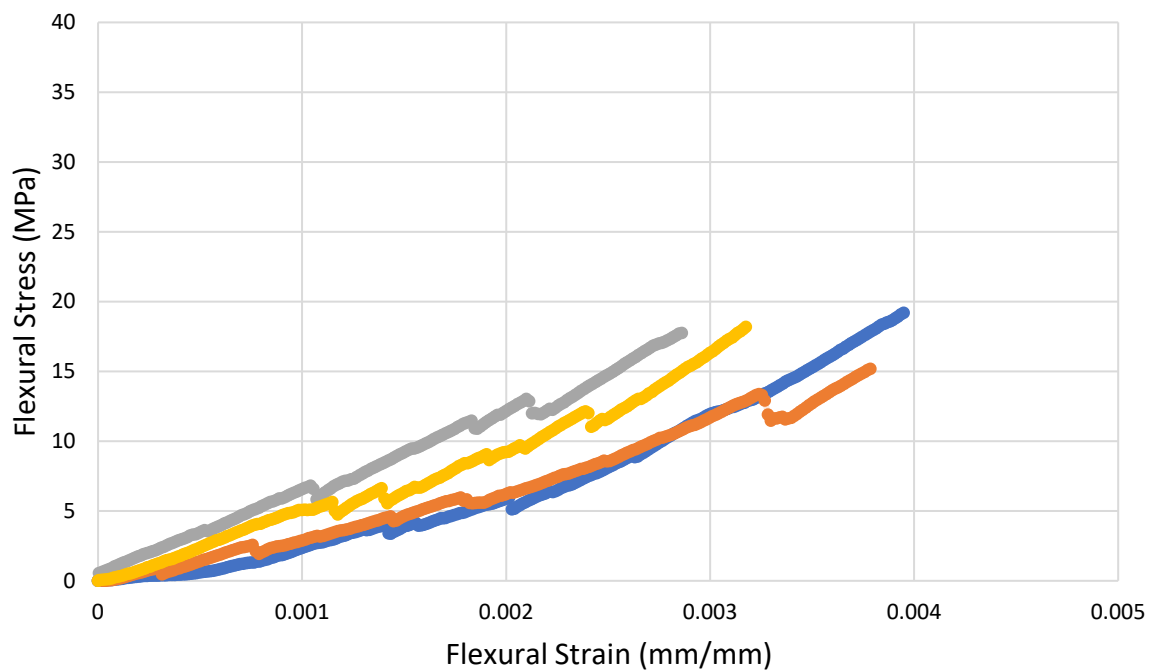

Figure S3: Stress-Strain Curves of the Batch 2.5h

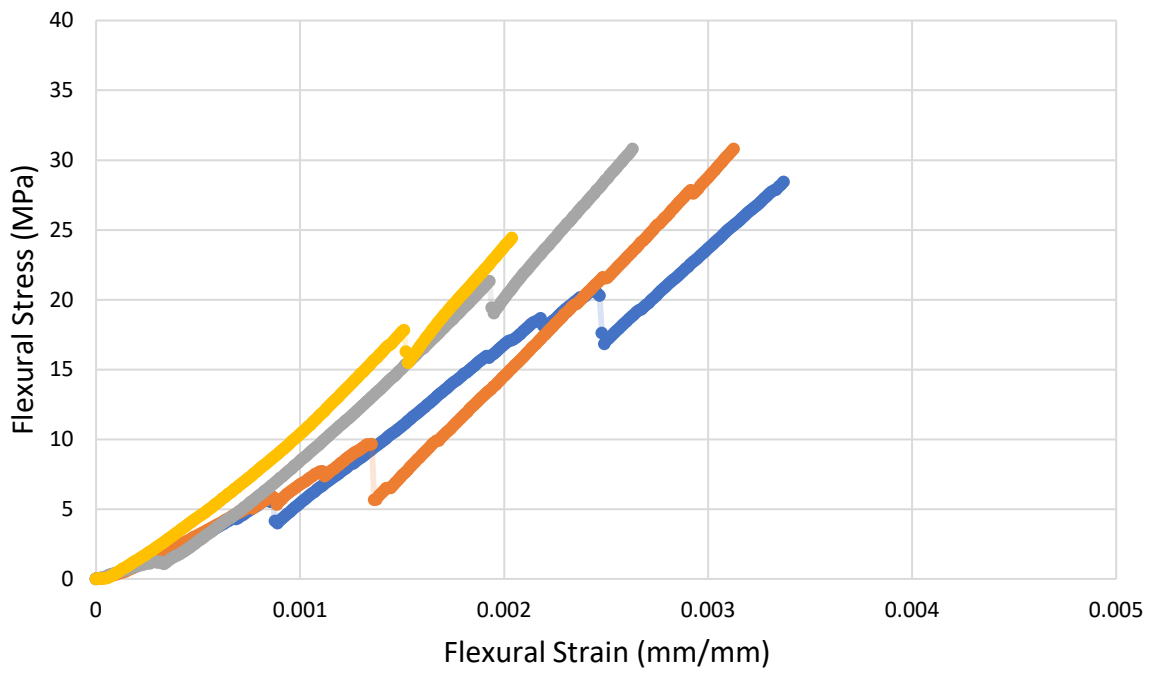

Figure S4: Stress-Strain Curves of the Batch 2.5v

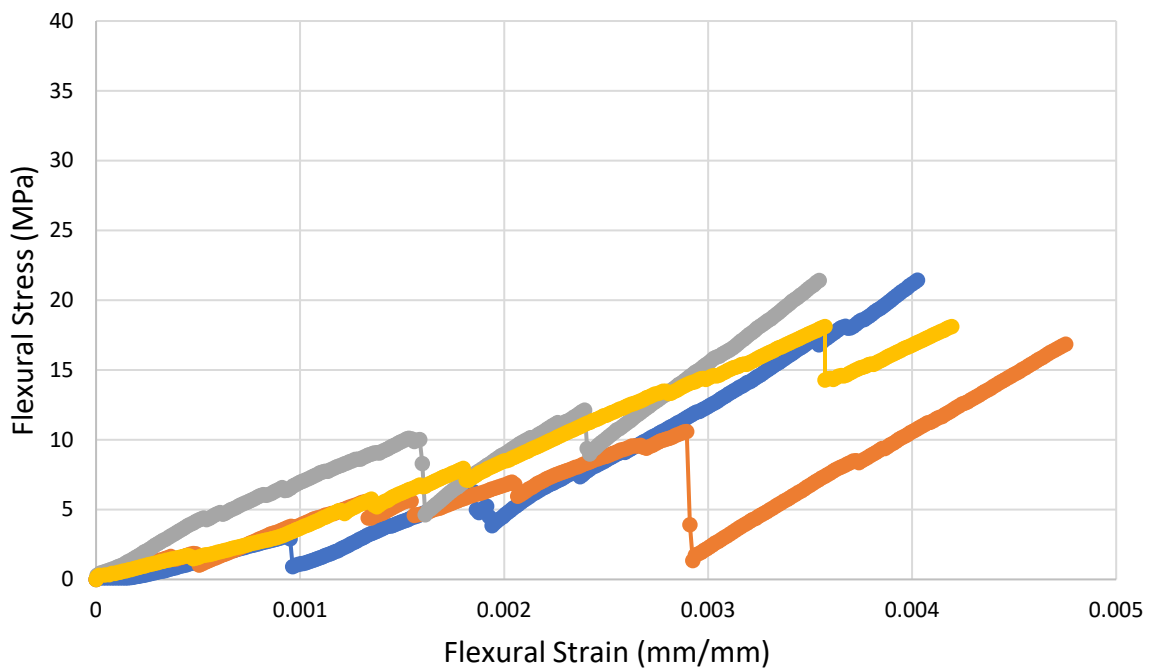

Figure S5: Stress-Strain Curves of the Batch 4h

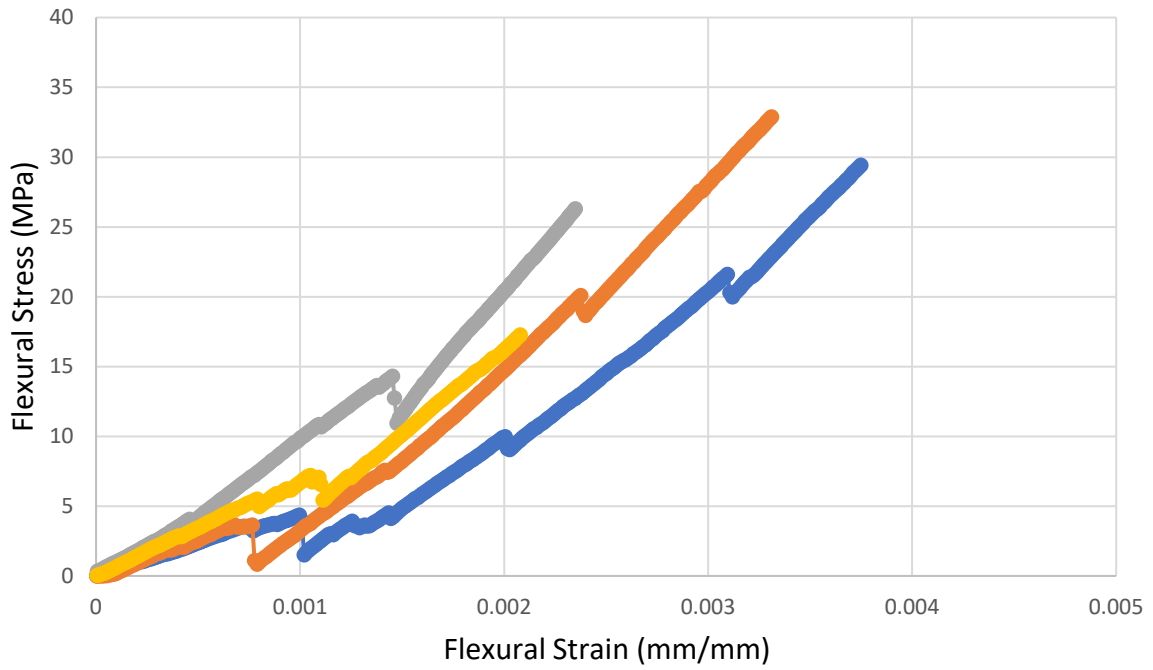

Figure S6: Stress-Strain Curves of the Batch 4v

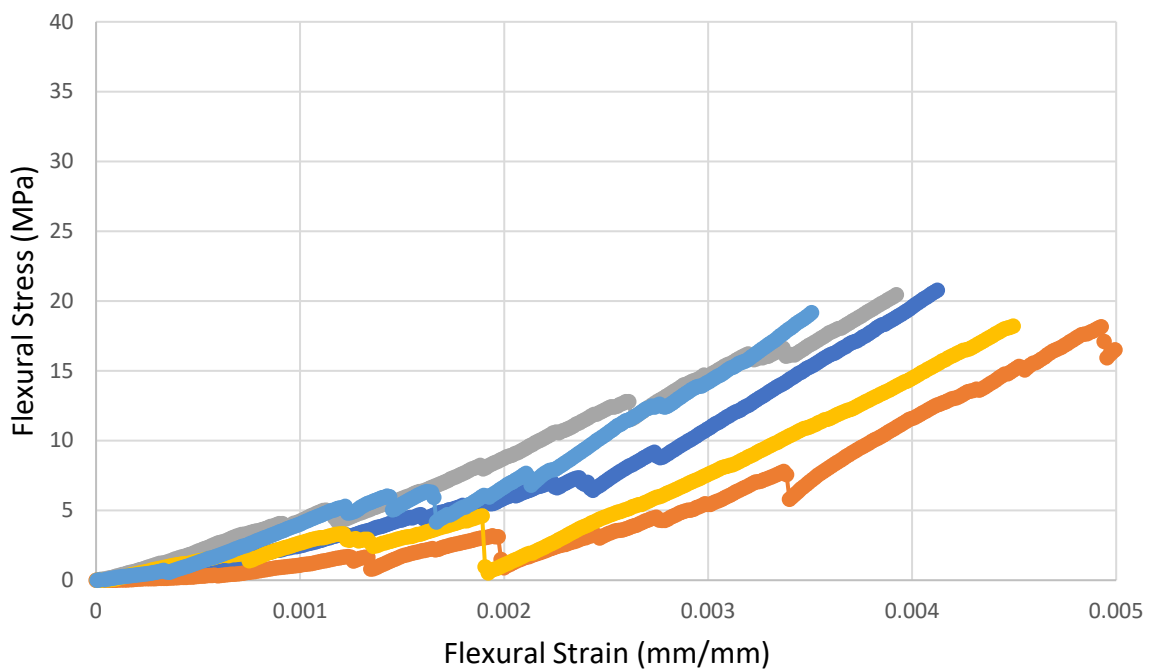

Figure S7: Stress-Strain Curves of the Batch 8h

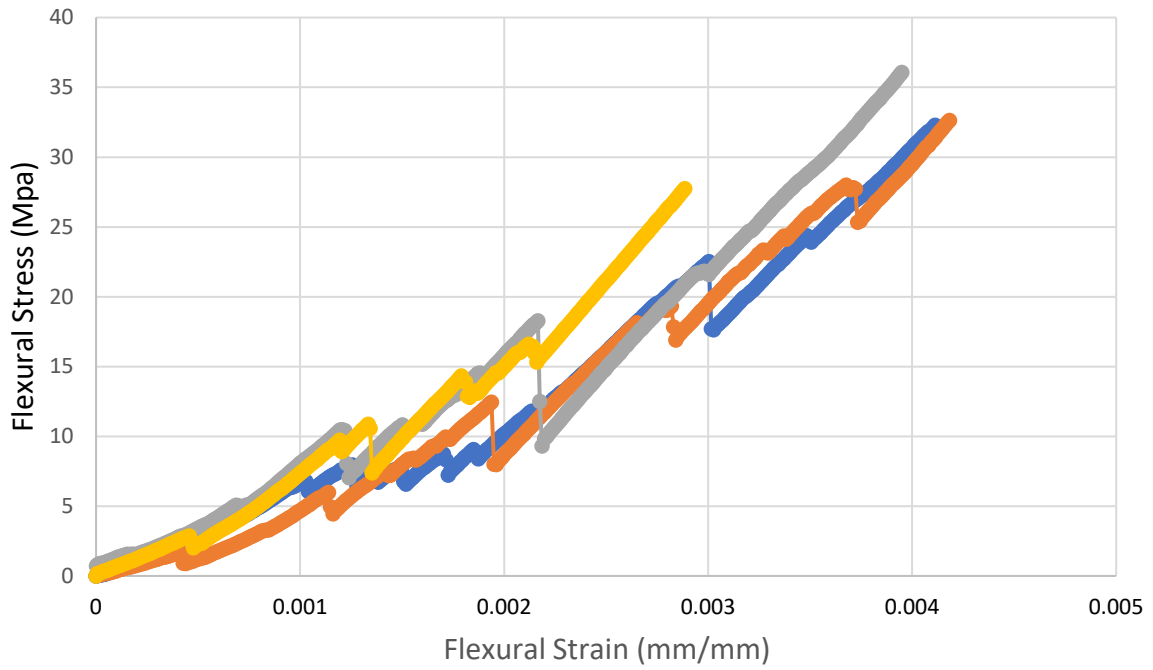

Figure S8: Stress-Strain Curves of the Batch 8v

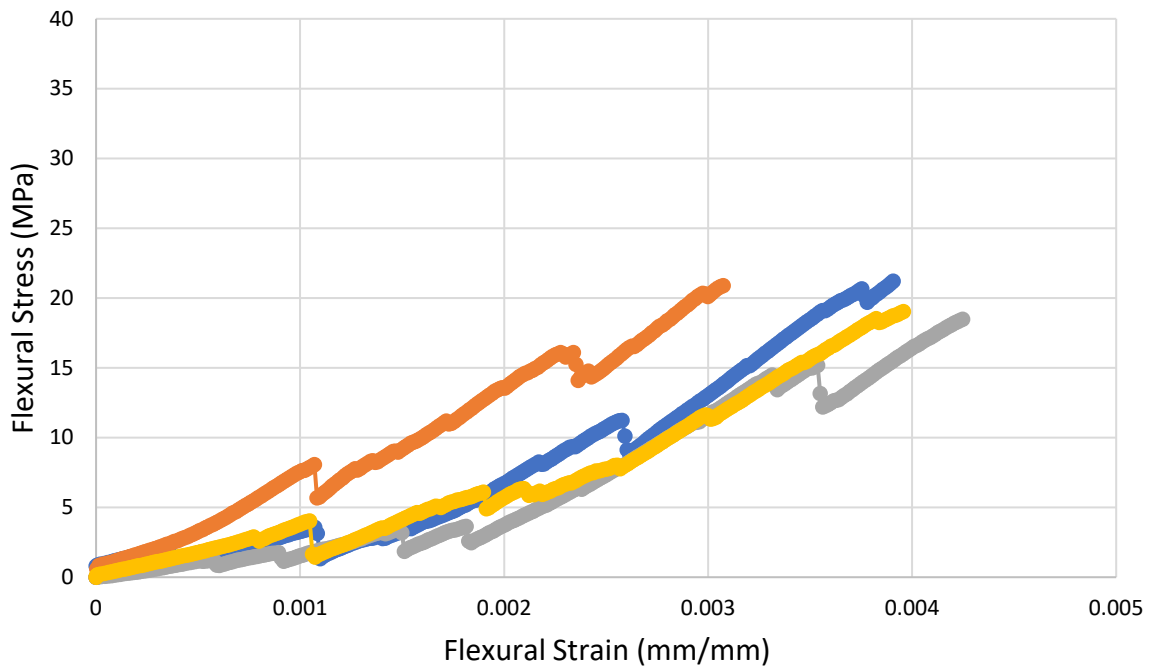

Figure S9: Stress-Strain Curves of the Batch 20%h

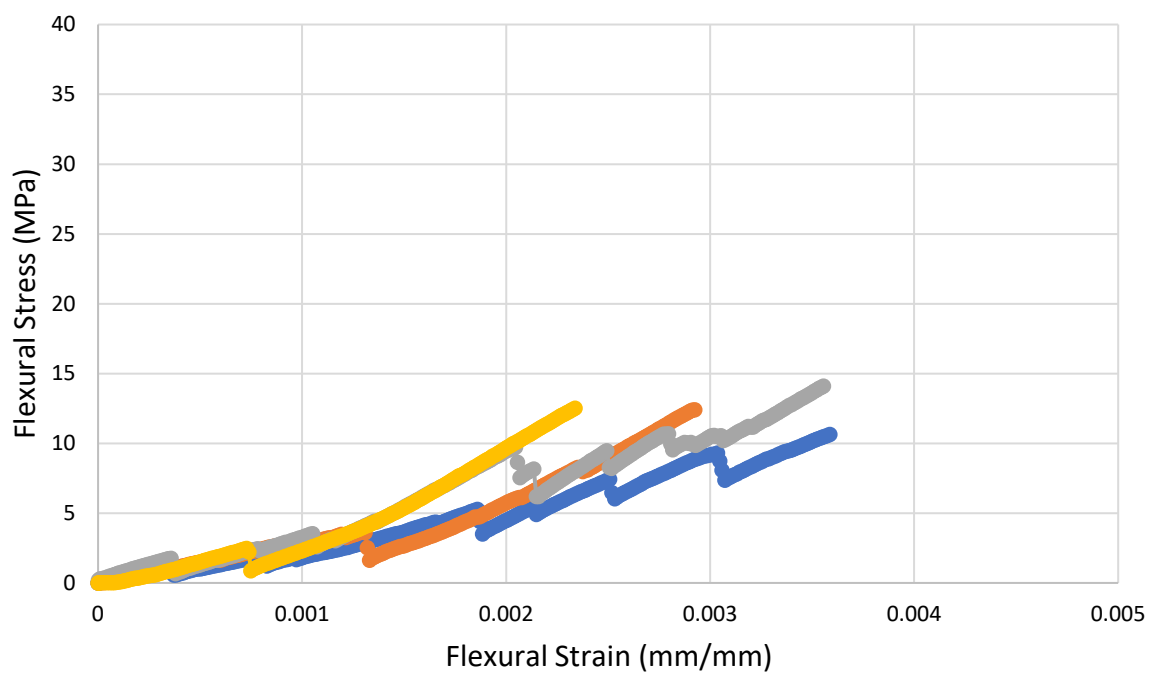

Figure S10: Stress-Strain Curves of Batch 20%v

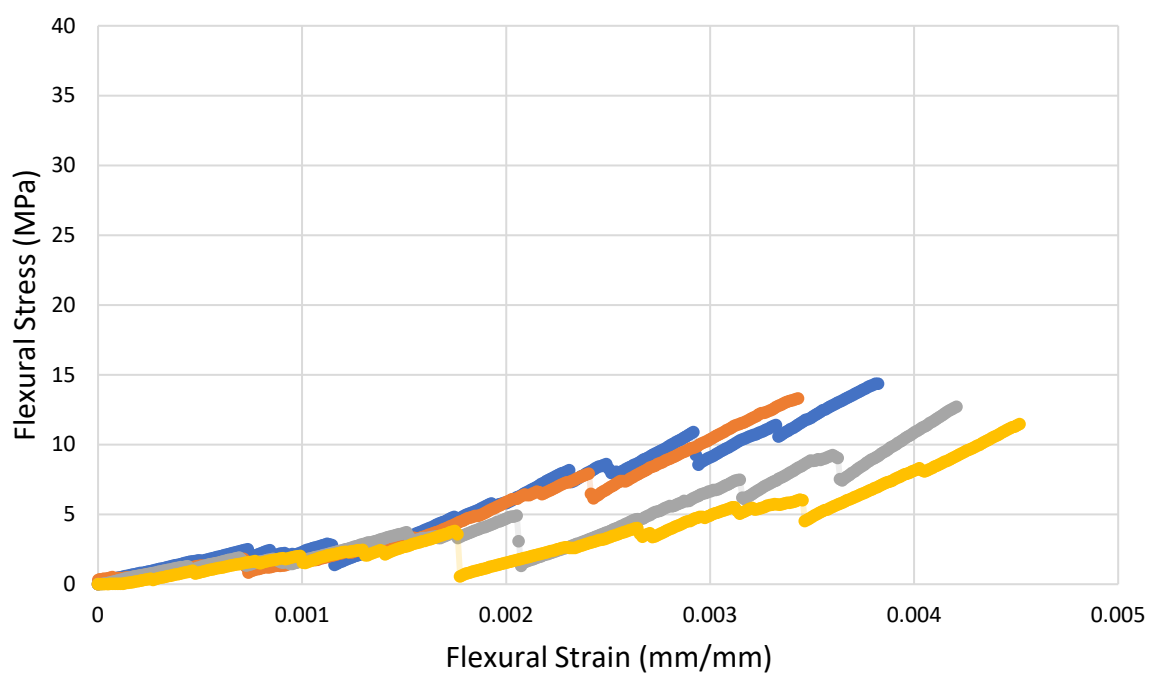

Supplement: s1 [file s1 › applsci-2102070-supplementary.pdf]
